# Supplementary material for: Online scenario simulation teaching in airway management for undergraduate anesthesia students
Source: Frontiers journal article supplement (doi:10.3389/fmed.2025.1563540), 2025-06-10

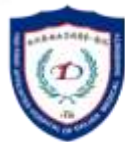

大连医科大学附属第一医院

THE FIRST AFFILIATED HOSPITAL OF DALIAN MEDICAL UNIVERSITY

# Online scenario simulation teaching in airway management for undergraduate anesthesia students

服务、创意，做什么都要好

聚焦医疗前沿，注重患者感受

弘道笃行 精诚大医

建设国内一流、国际知名的 医疗研究型大学附属医院

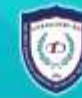

**In this presentation, we will provide a demonstration some of online scenario simulation teaching components discussed in the article.**

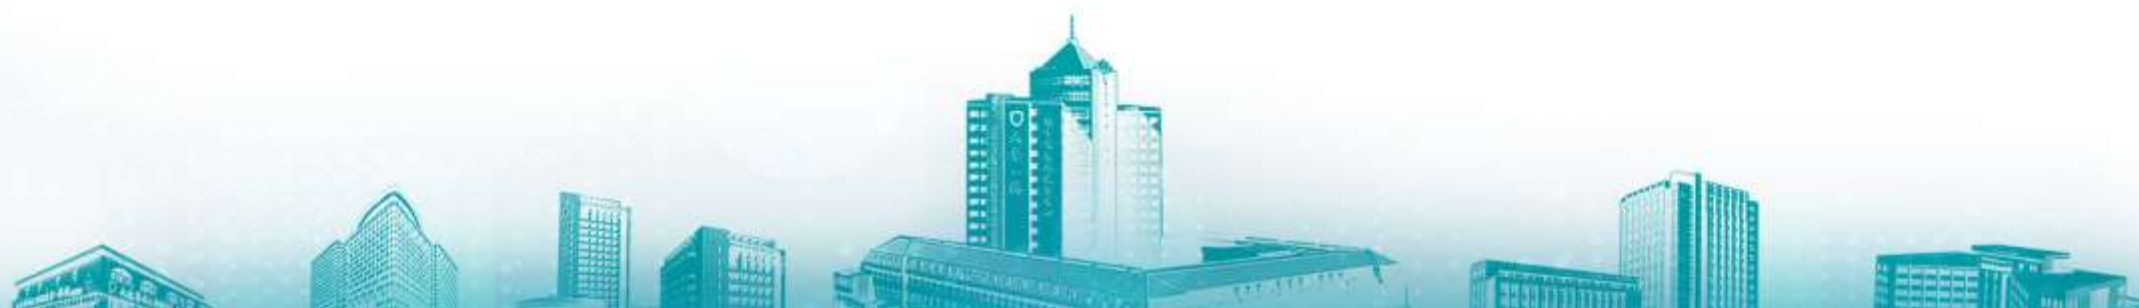



# **Online scenario simulation teaching for difficult airway management during thyroid surgery.**



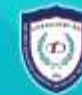

## Patient Cases

- ◆ A 60-year-old woman.
- ◆ Health ,no abnormalities in all examinations.
- ◆ Radical surgery for thyroid cancer under general anesthesia.



**13:30** Upon arrival in the operating room, Bp 120/80 mmHg, HR 80 bpm, SpO<sub>2</sub> 96%.

**13:35** Oxygen was supplied via a mask at a flow rate of 6 /min, which successfully increased the SpO<sub>2</sub> to 98%. Anesthesia was induced three minutes later using a combination of midazolam 1 mg, propofol 100 mg, sufentanil 20 µg, and rocuronium bromide 45 mg.

**13:42** A direct laryngoscopic intubation was performed.

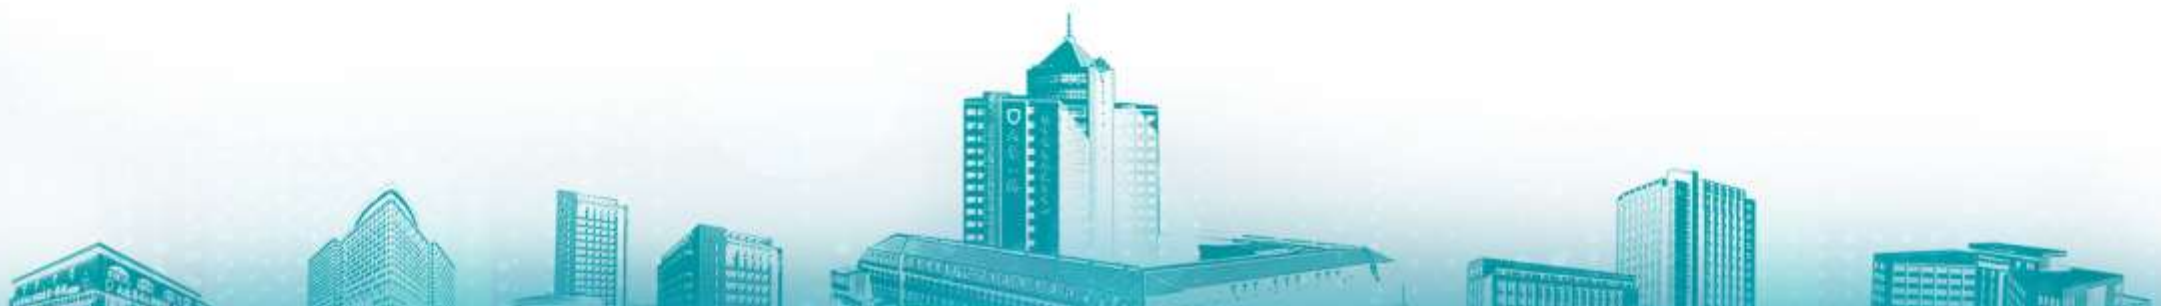

**13:43** Post-laryngoscopic Visualization of Vocal Folds Reveals the Following Image:

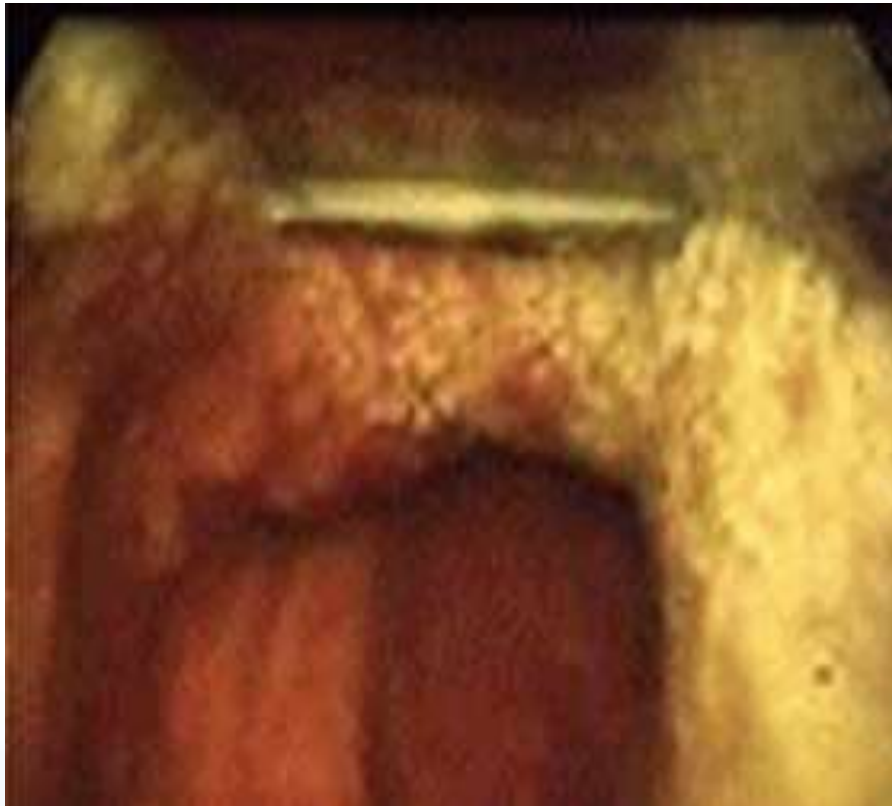

What are you gonna do?

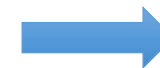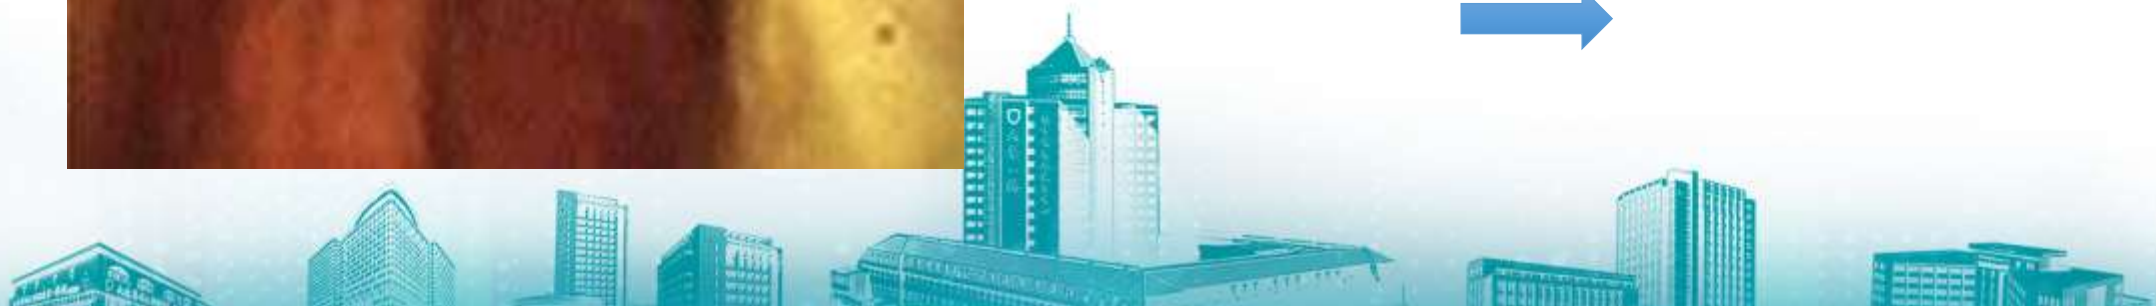



Following the unsuccessful attempt at intubation with a standard laryngoscope, a video laryngoscope was employed in an effort to improve visualization. However, despite these efforts, the vocal folds could not be adequately exposed, resulting in a continued failure to intubate and a consequent decline in oxygen saturation levels.

13:50

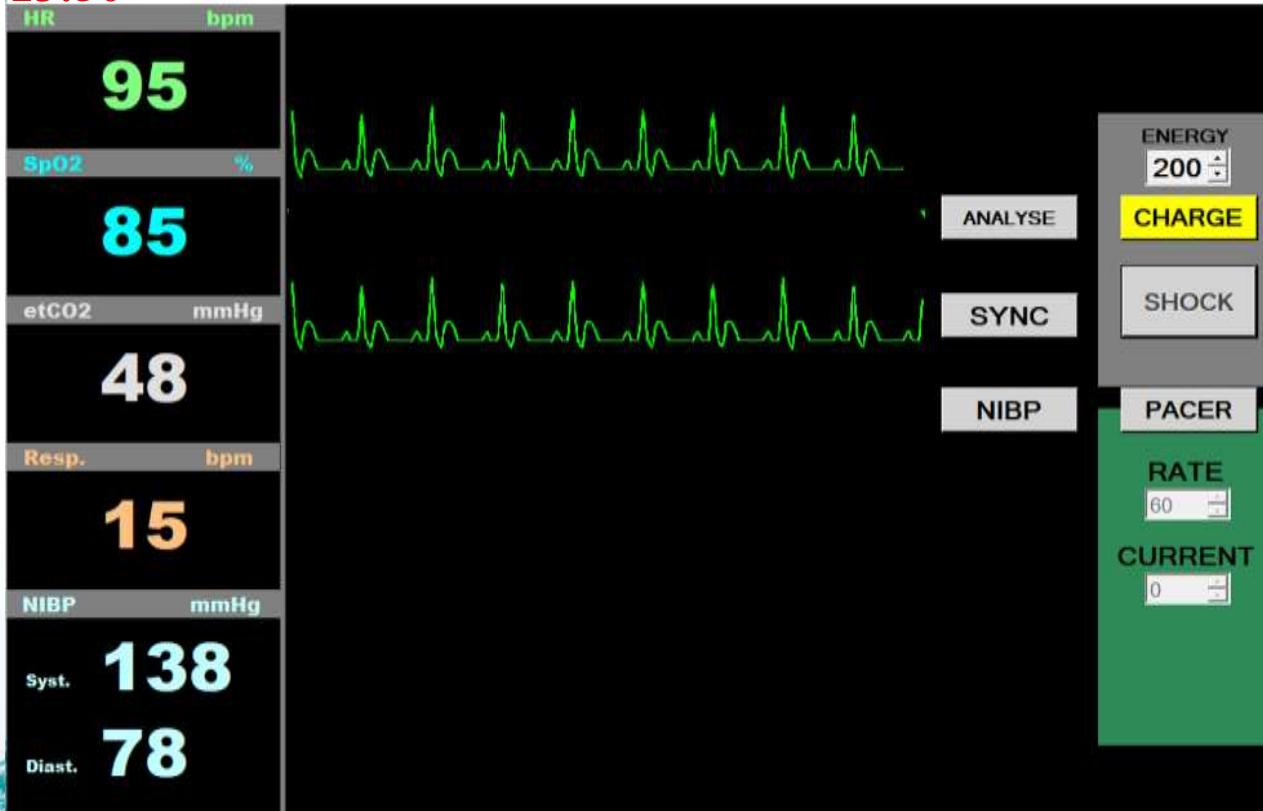

What are you gonna do?

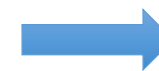

After withholding intubation for mask ventilation, the vital signs were as follows:

13:55

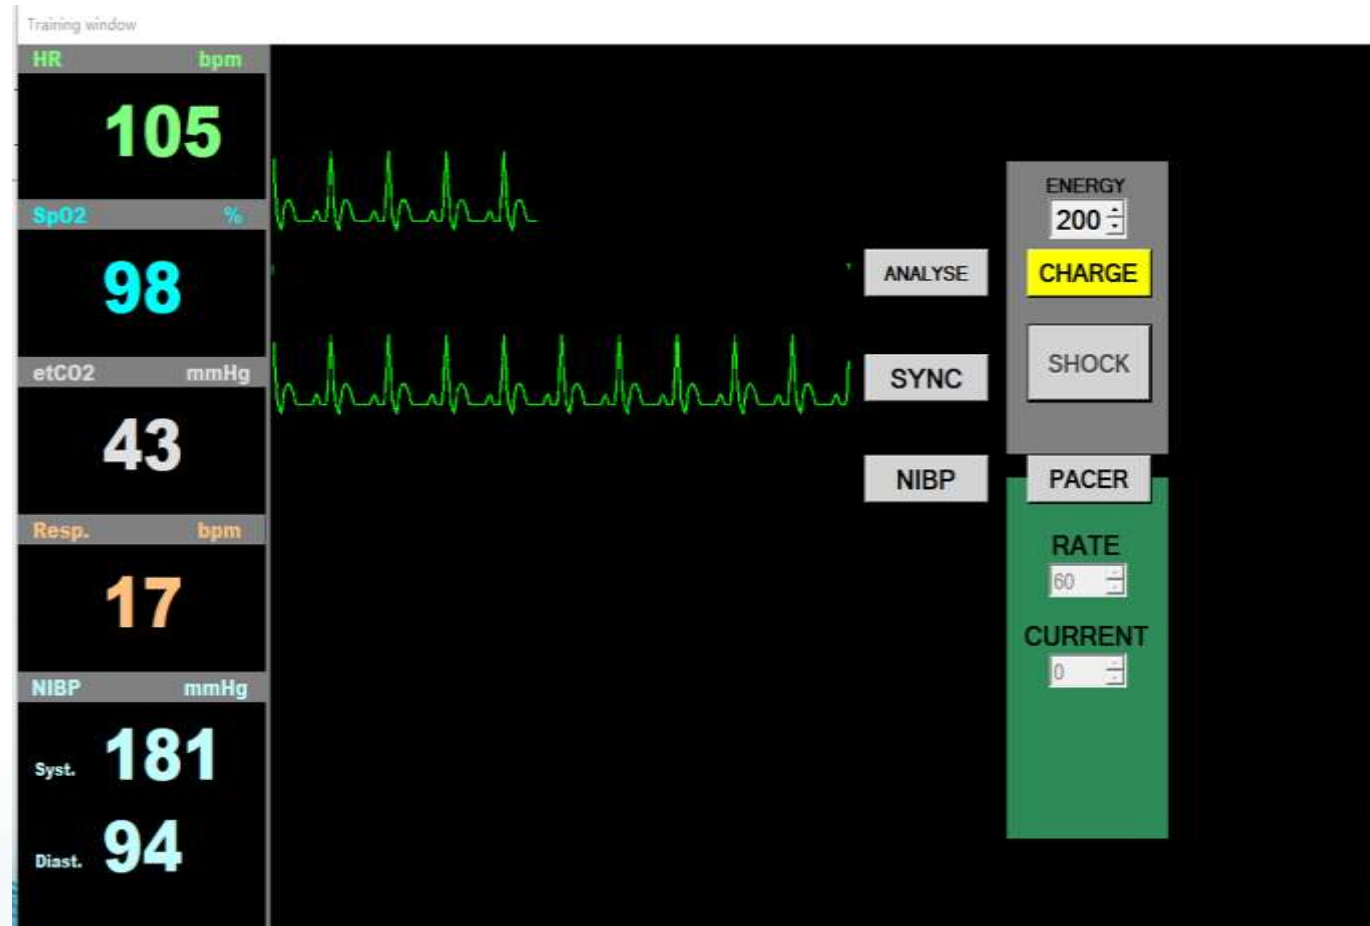

What are you gonna do?

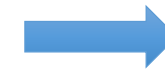



**14:00** Post-treatment, the patient's vital signs were stable.

**14:06** A subsequent attempt to intubate using a video laryngoscope was unsuccessful. Consequently, a face mask was utilized for manual ventilation. This intervention was met with increased resistance to air entry, and auscultation revealed crackling sounds (rales) in both lungs. Additionally, there was a notable decline in oxygen saturation levels.

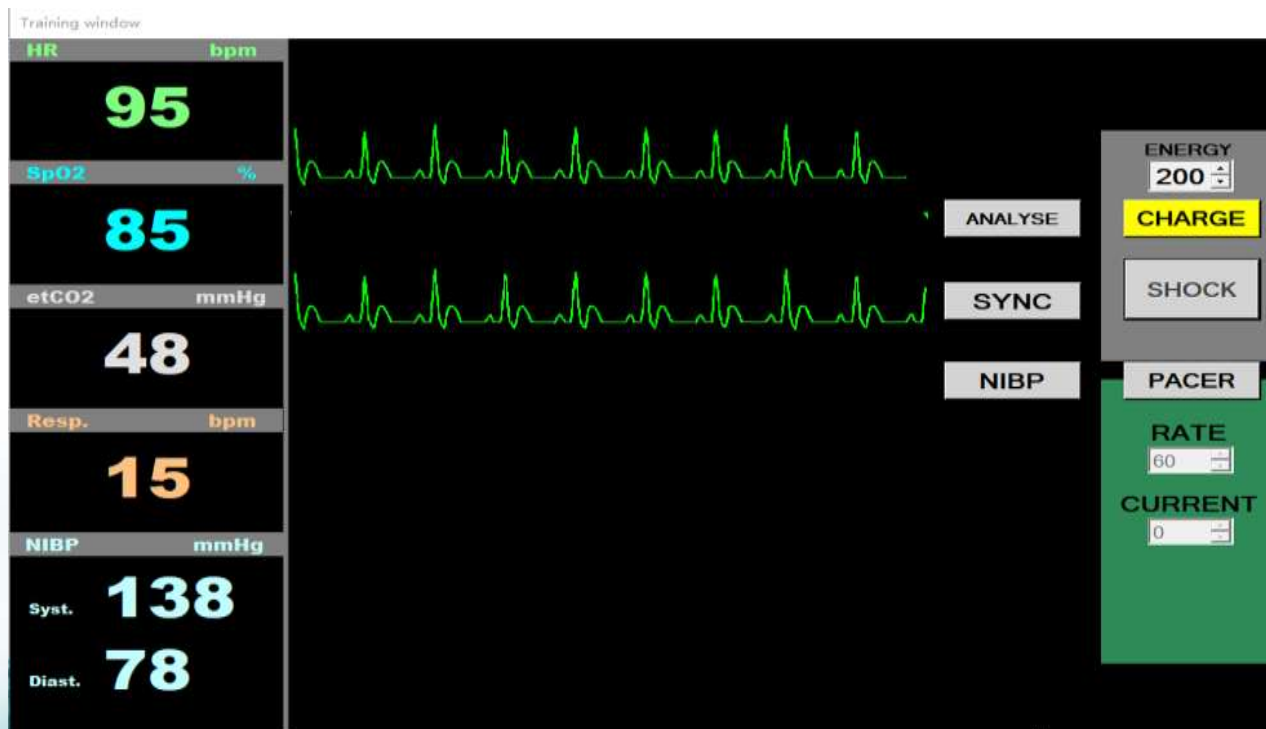

What happened to the patient?

What are you gonna do?

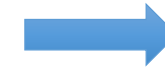

Call the supervising physician , and what medication would you use to relieve bronchospasm?

14:15

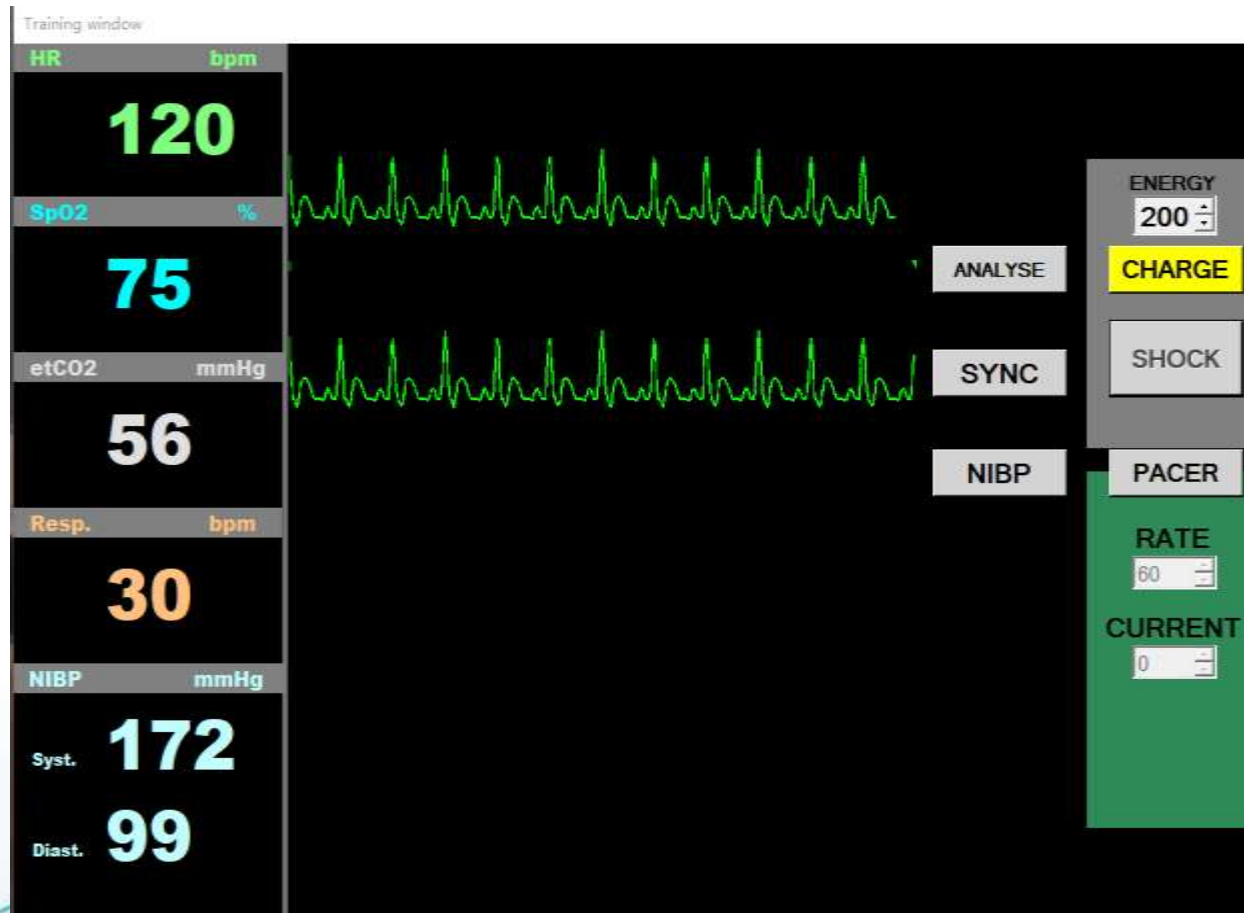

What are you gonna do?



**14:25** Following all attempts, the patient's vital signs were successfully stabilized, and the supervising physician successfully performed the tracheal intubation.

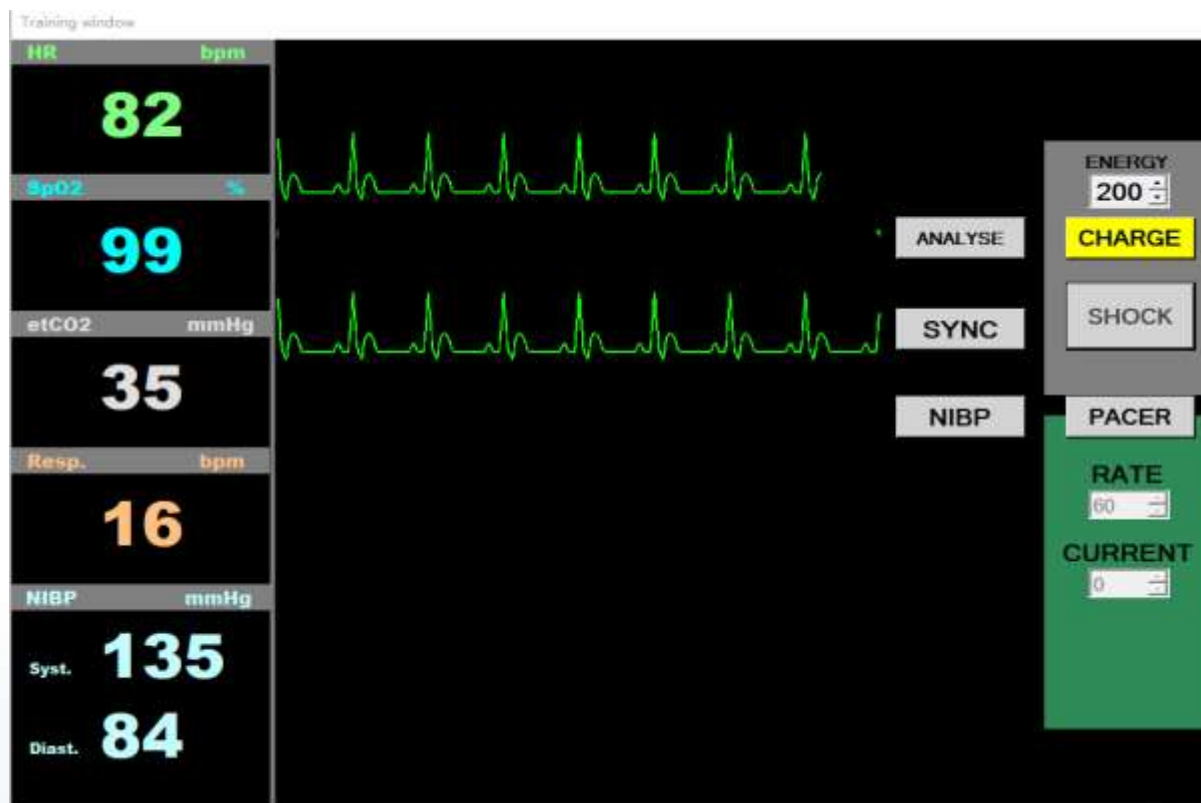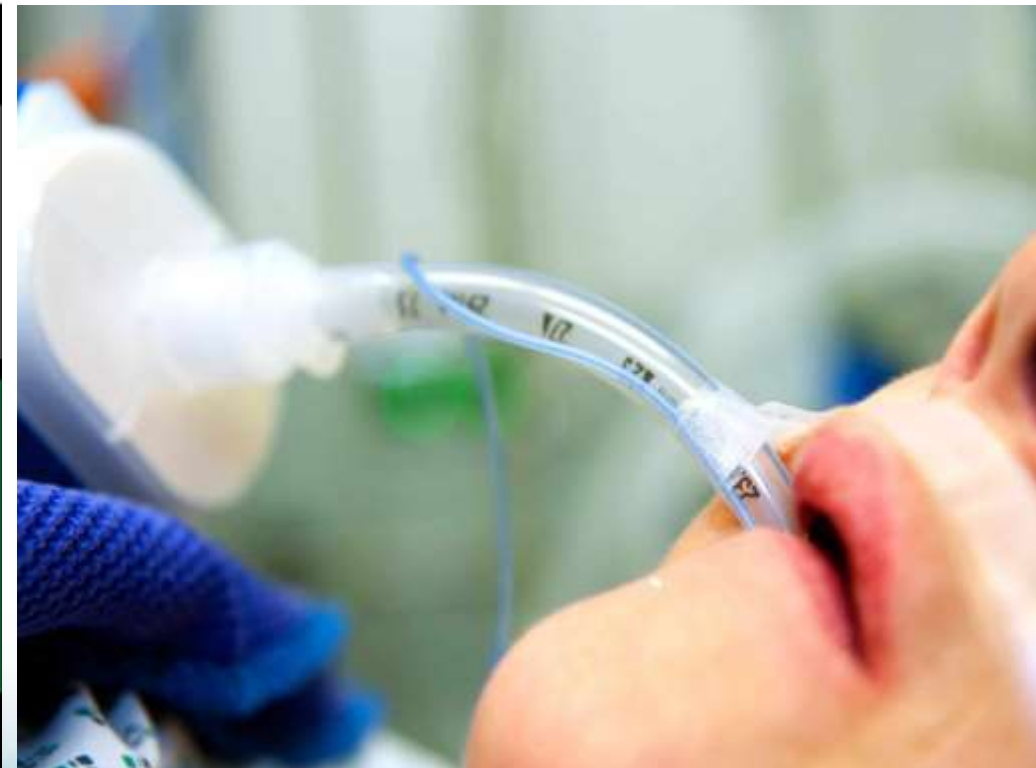

Supplement: Data_Sheet_1.pdf [file Data_Sheet_1.pdf]
