# Supplementary material for: Online scenario simulation teaching in airway management for undergraduate anesthesia students
Source: Frontiers journal article supplement (doi:10.3389/fmed.2025.1563540), 2025-06-10
Supplement: Data_Sheet_2.pdf [file Data_Sheet_2.pdf]

## Supplementary Material 2. Standardized non-technical skills assessment

| Assessment category   | Assessment criteria                                                                                                                                                                    | Score |
|-----------------------|----------------------------------------------------------------------------------------------------------------------------------------------------------------------------------------|-------|
| Task Management       | Tasks are allocated reasonably with clear priorities<br>Equipment is prepared and procedures are performed skillfully<br>Multiple tasks are managed effectively without confusion      |       |
| Teamwork              | Good collaboration among team members with clear division of labor<br>Effective communication to avoid misunderstandings<br>Plays an active role in the team, supporting other members |       |
| Communication         | Information is conveyed clearly and accurately<br>Effectively listens to others' opinions<br>Effectively communicate critical information in emergencies                               |       |
| Sustained Vigilance   | Continuous attention to the patient's condition without negligence<br>Timely identification of potential issues<br>Maintains focus during prolonged operations                         |       |
| Crisis Identification | Rapid identification of crisis situations<br>Timely measures taken to address crises<br>Remains calm in crisis situations                                                              |       |
| Decision Making       | Can make sound decisions quickly<br>Adjust decisions based on circumstances<br>Can explain the basis for decisions                                                                     |       |
| Self-Confidence       | Confidence in own skills and decisions<br>Maintains confidence under pressure<br>Learn from mistakes and makes improvements                                                            |       |
